# Supplementary material for: RIPK1-dependent necroptosis promotes vasculogenic mimicry formation via eIF4E in triple-negative breast cancer
Source: PubMed Central journal article supplement (PMC10203343; doi:10.1038/s41419-023-05841-w), 2023-05-22

Figure 1I

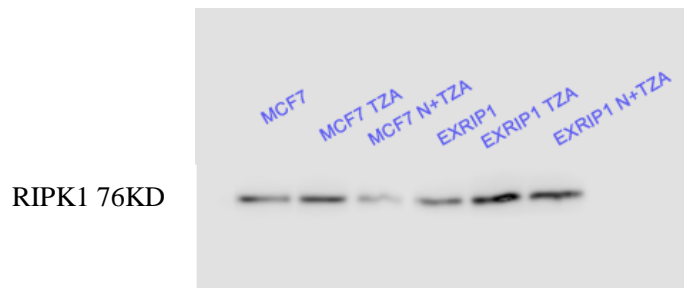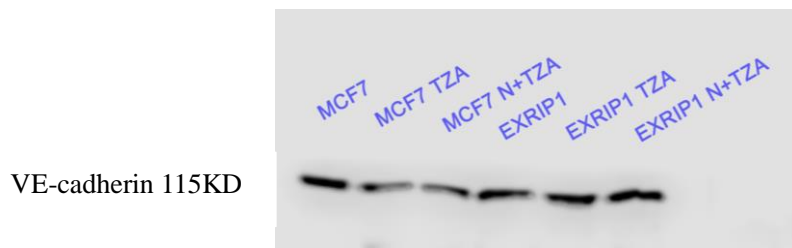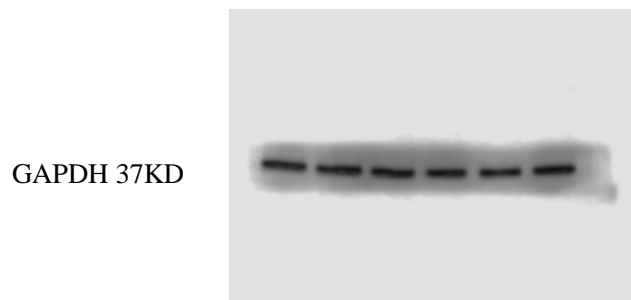

Figure 2A

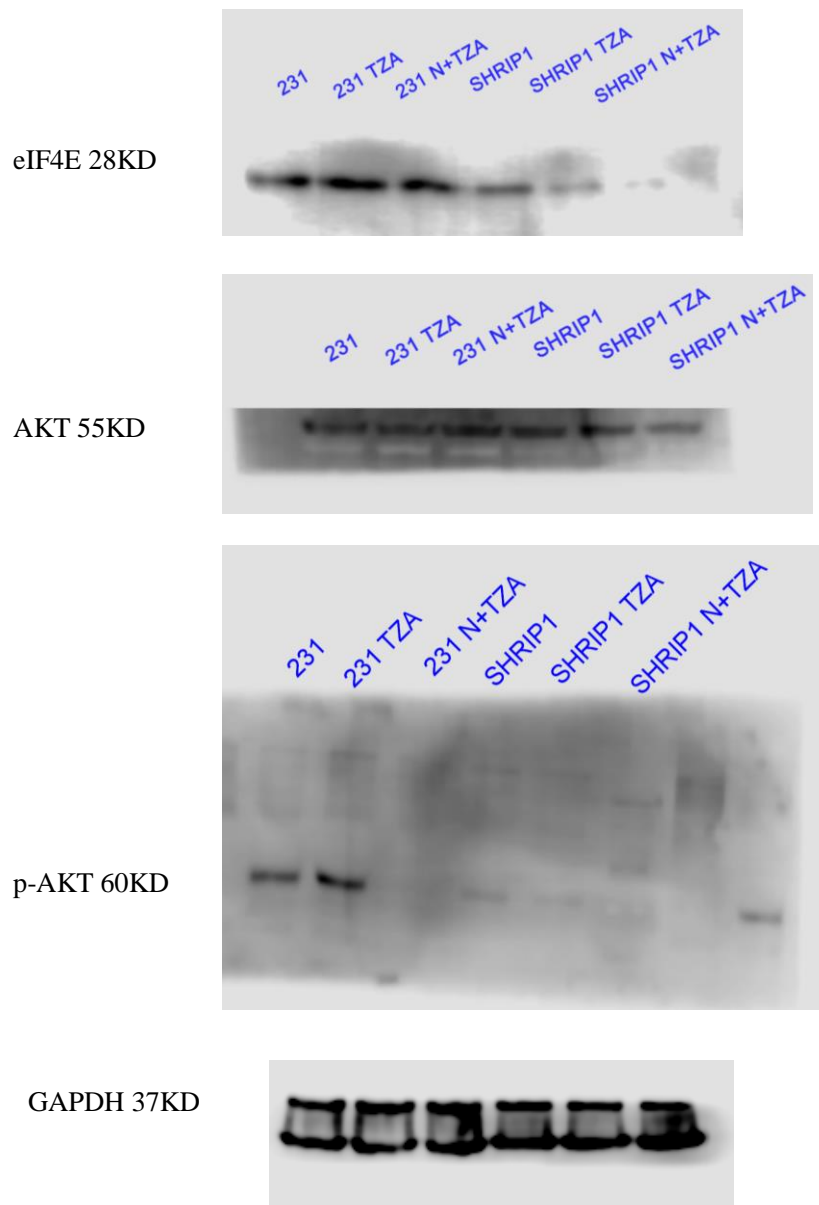

Figure 2C

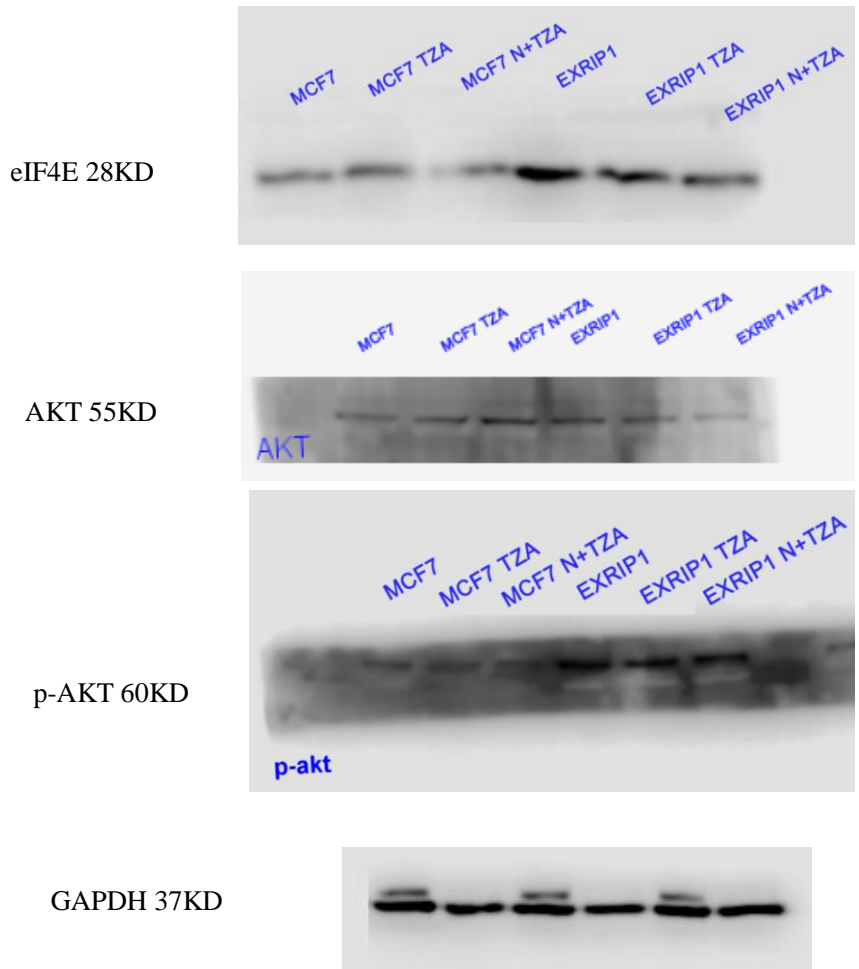

Figure 2E

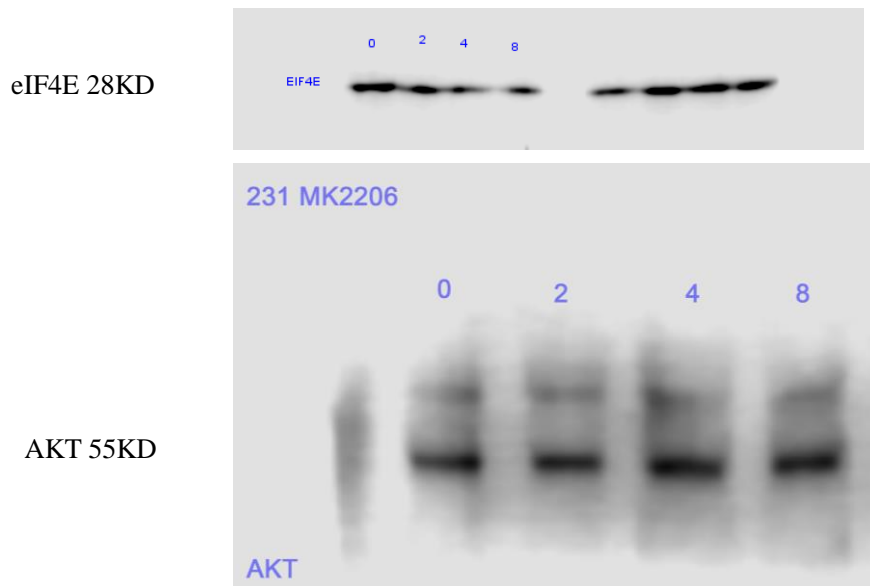

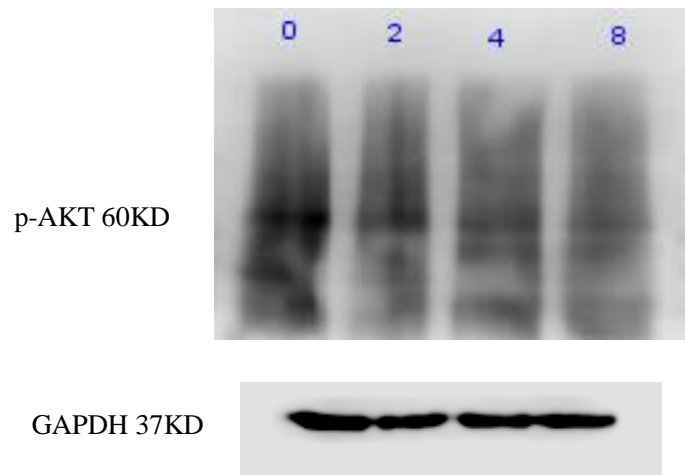

Figure 2F

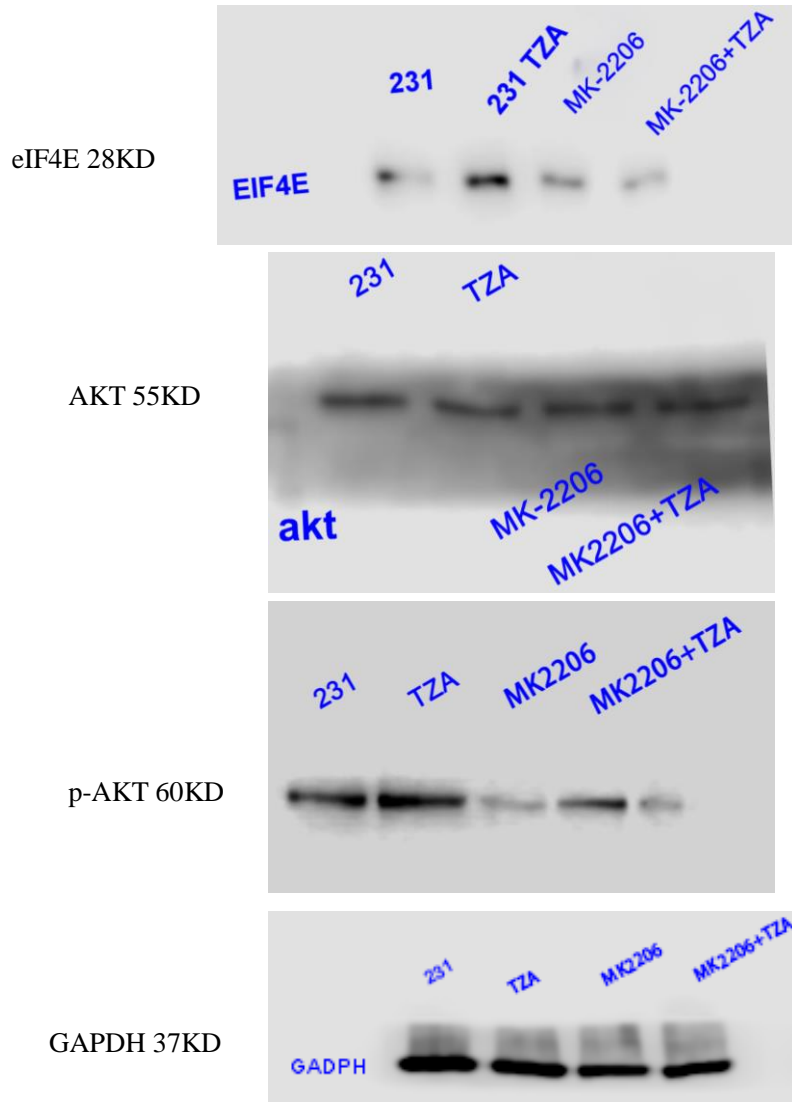

Figure 3I

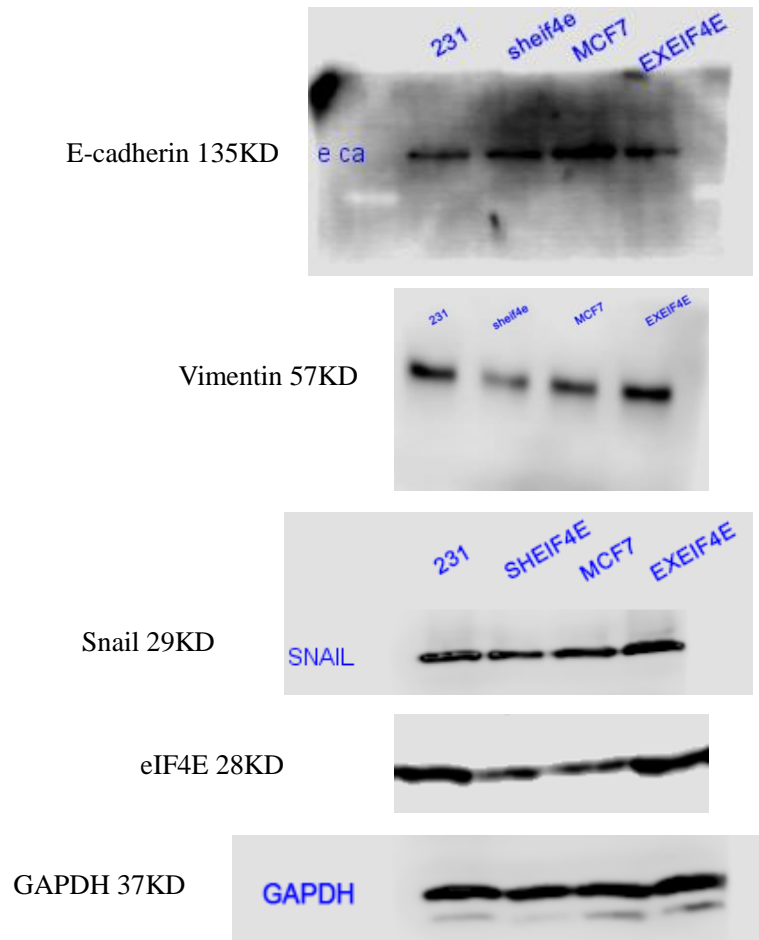

Figure 5A

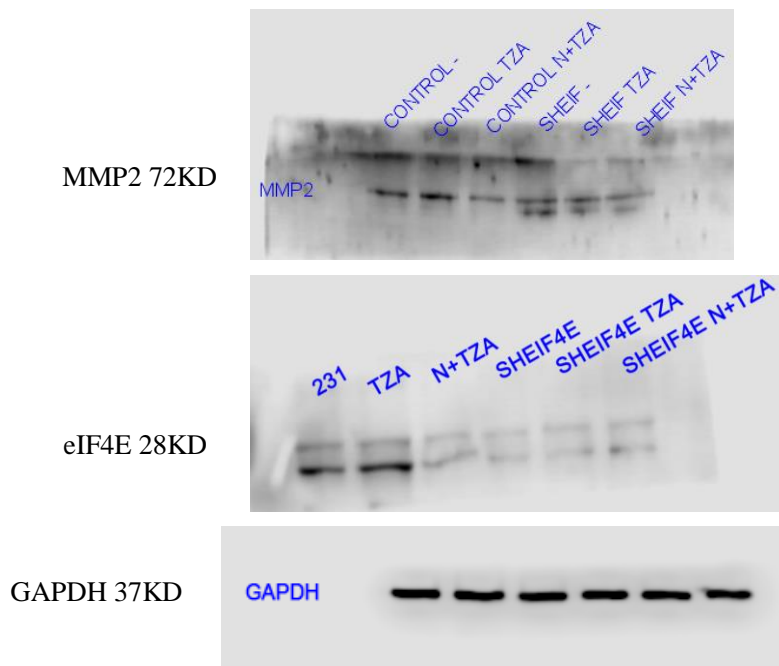

Figure 5C

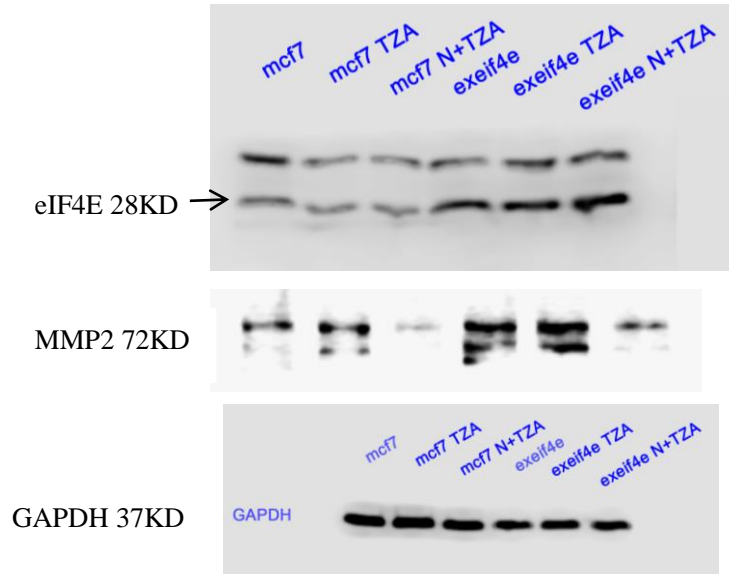

Figure S1A

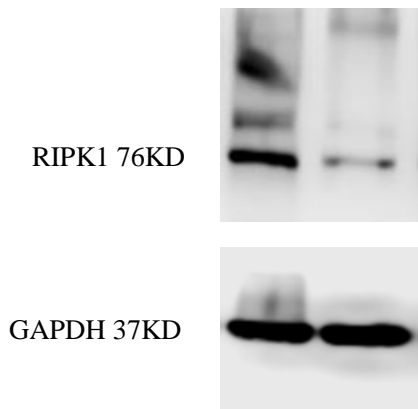

Figure S1C

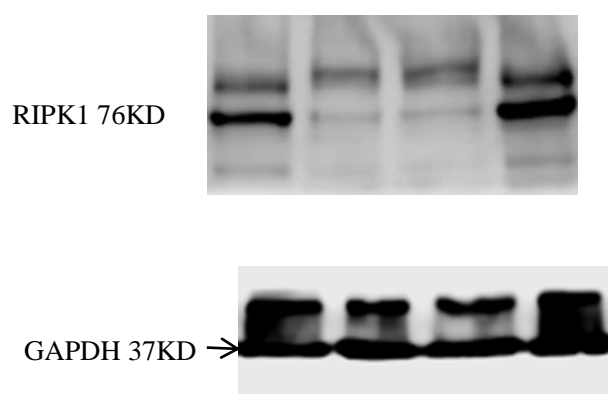

Figur S3A

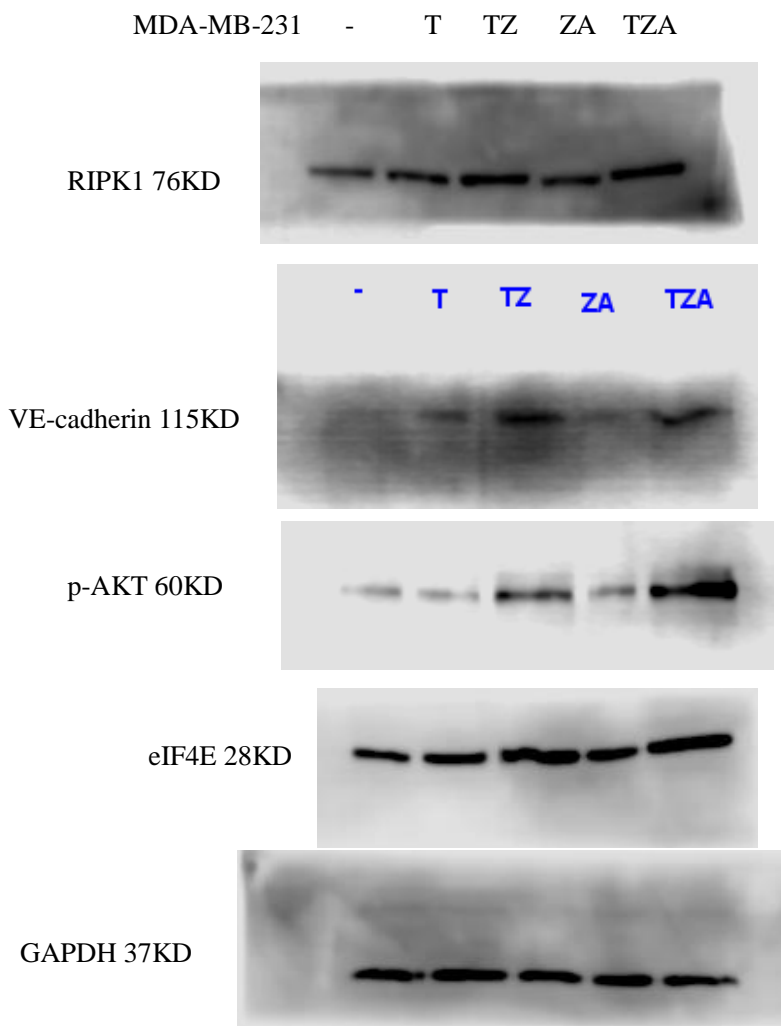



Figur S3B

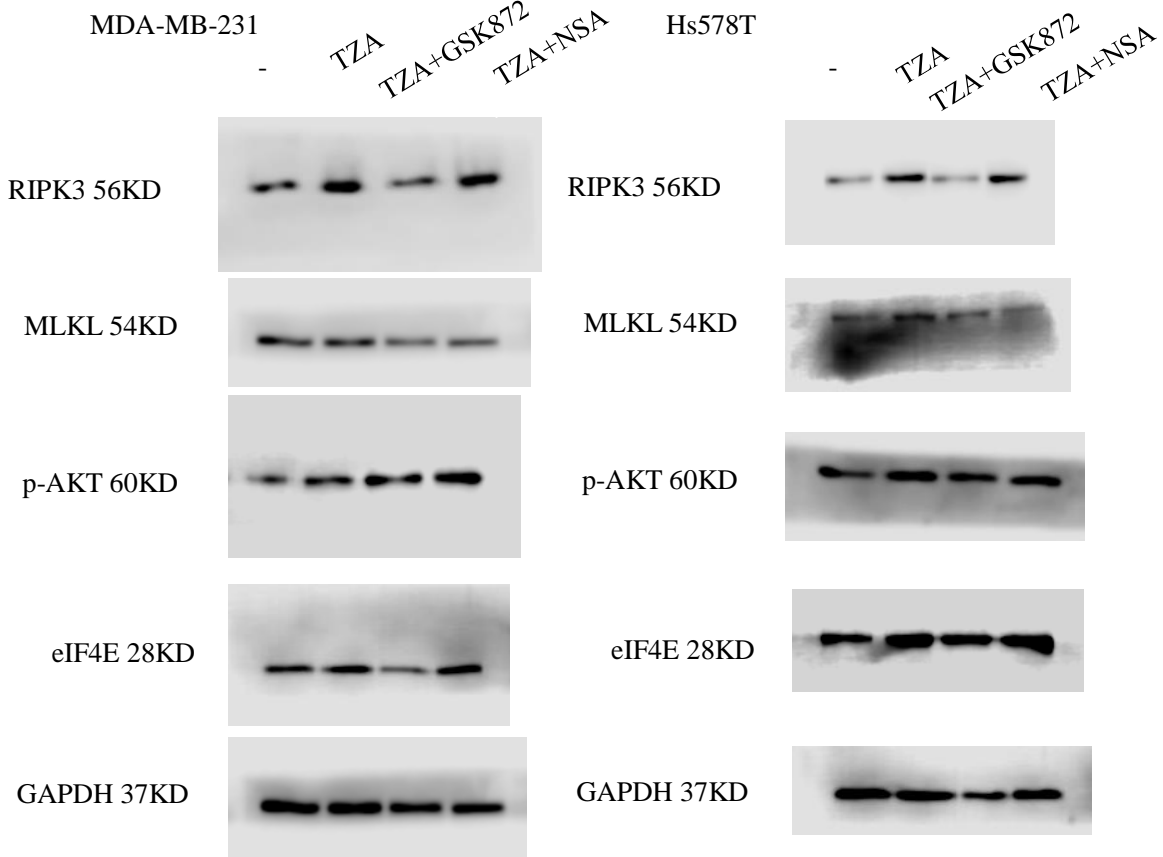

Figure S4A

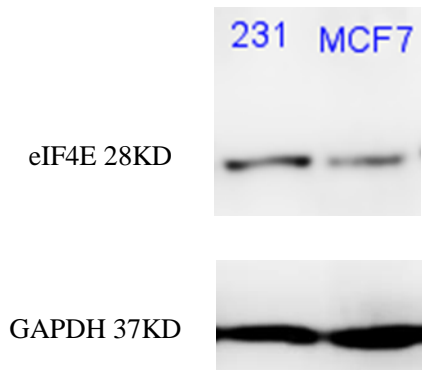

Figure S4C

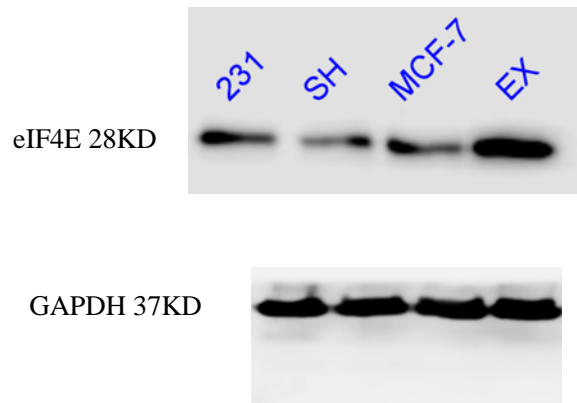

Supplement: 41419_2023_5841_MOESM10_ESM.pdf [file 41419_2023_5841_MOESM10_ESM.pdf]
